# Supplementary material
Source: MDPI journal article supplement (https://www.mdpi.com/2571-9408/4/4/176)
Supplement: s1 [file s1]

## SUPPLEMENTARY MATERIAL

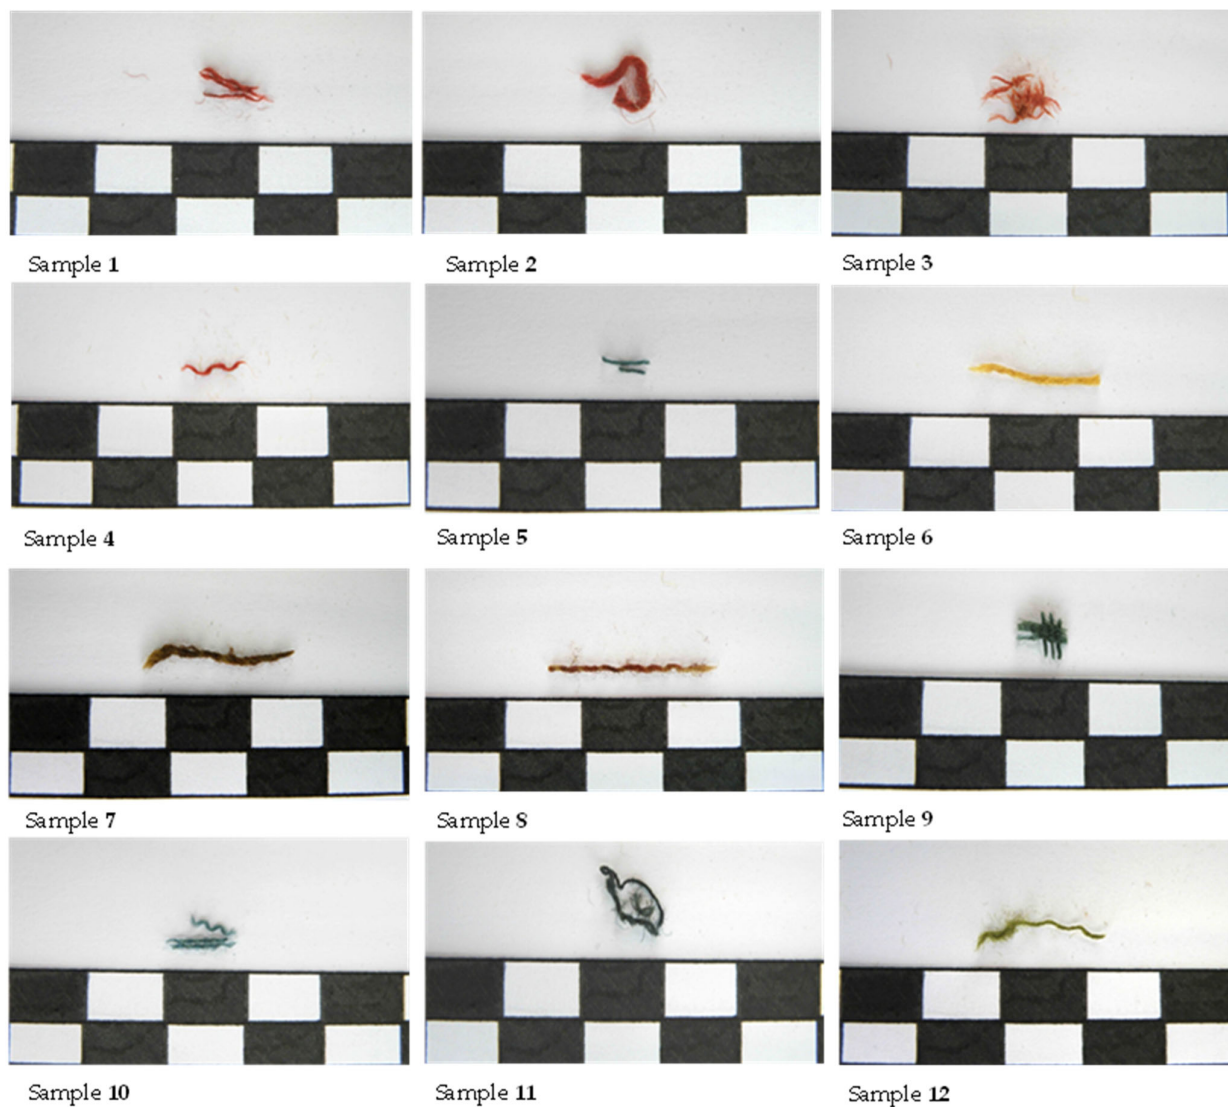

**Figure S1.** Photographs of samples which were included in the study. Rectangles of the ruler are 1 cm long.
